# Supplementary material for: A unified statistical RRKM approach to the fragmentation and autoneutralization of metastable molecular negative ions of hexaazatrinaphthylenes
Source: Royal Society of Chemistry journal article supplement (doi:10.1039/c9cp05397b), 2020-01-01
Supplement: c9cp05397b1.pdf [file c9cp05397b1.pdf]

## Supplementary Material

### UNIFIED STATISTICAL RRKM APPROACH TO THE FRAGMENTATION AND AUTONEUTRALIZATION OF METASTABLE MOLECULAR NEGATIVE IONS OF HEXAAZATRINAPHTHYLENES

**Rustem V. Khatymov<sup>1</sup>, Pavel V. Shchukin<sup>1</sup>, Mars V. Muftakhov<sup>1</sup>, Igor K. Yakushchenko<sup>2</sup>,  
Ol'ga V. Yarmolenko<sup>2</sup>, Evgeniy Yu. Pankratyev<sup>1</sup>**

<sup>1</sup>Institute of Molecule and Crystal Physics, Ufa Federal Research Centre of the Russian  
Academy of Sciences, Ufa 450075, Russia

<sup>2</sup>Institute of Problems of Chemical Physics, Russian Academy of Sciences, Chernogolovka,  
Moscow Region 142432, Russia

Table S1.

Theoretical thermochemical characteristics of HATNA according to DFT calculations and those measured / estimated from experimental data

| Thermochemical parameter <sup>a</sup>                                                                      | Value, eV                                                                        |
|------------------------------------------------------------------------------------------------------------|----------------------------------------------------------------------------------|
| Molecular adiabatic electron affinity, $EA_a(^2M^{\cdot-} \rightarrow ^1M+e)$                              | $2.76 \pm 0.40^b$<br>1.45 <sup>c</sup><br>2.15 <sup>d</sup><br>2.21 <sup>e</sup> |
| Adiabatic electron affinity of dehydrogenated molecule, $EA_a(^3[M-H]^- \rightarrow ^2[M-H]^{\cdot-} + e)$ | 2.28 <sup>e,f</sup>                                                              |
| Bond dissociation energy in neutral molecule<br>$BDE(^1M \rightarrow ^2[M-H]^{\cdot+} + ^2H)$              | 4.72 <sup>e,f</sup>                                                              |
| Bond dissociation energy in molecular anion<br>$BDE(^2M^{\cdot-} \rightarrow ^3[M-H]^- + ^2H^{\cdot})$     | 4.66 <sup>e,f</sup>                                                              |
| Threshold appearance energy of $[M-H]^-$ ions,<br>$AE(^1M+e \rightarrow ^3[M-H]^- + ^2H^{\cdot})$          | 2.44 <sup>e,f</sup><br>> 5 <sup>g</sup>                                          |

<sup>a</sup> The schemes of the processes for calculating energy change are shown in parenthesis. Left superscript digit denotes a spin multiplicity of corresponding species found to be the lowest in energy according to quantum-chemical calculations.

<sup>b</sup> Solid state electron affinity measured by inverse photoelectron spectroscopy <sup>[S1, S2]</sup>

<sup>c</sup> Theoretical DFT B3LYP/6-31G\*\* prediction for gas phase molecules <sup>[S2]</sup>

<sup>d</sup> Best fit result from the statistical RRKM model, this work (see Section 3.3)

<sup>e</sup> Result from DFT PBE/3 $\zeta$  calculations (see Section 3.1).

<sup>f</sup> H-atom abstraction energies from the structural positions 1 and 2 (see Chart 1) coincide within  $\pm 0.04$  eV; mean value is shown.

<sup>g</sup> Visual estimates from experimental EYC of  $[M-H]^-$  ions in Fig. 2c

## References

- [S1] B. R. Kaafarani, T. Kondo, J. Yu, Q. Zhang, D. Dattilo, C. Risko, S. C. Jones, S. Barlow, B. Domercq, F. Amy, A. Kahn, J.-L. Brédas, B. Kippelen, S. R. Marder. High Charge-Carrier Mobility in an Amorphous Hexaazatrinaphthylene Derivative. *Journal of the American Chemical Society*. **2005**;127:16358-16359.
- [S2] S. Barlow, Q. Zhang, B. R. Kaafarani, C. Risko, F. Amy, C. K. Chan, B. Domercq, Z. A. Starikova, M. Y. Antipin, T. V. Timofeeva, B. Kippelen, J.-L. Brédas, A. Kahn, S. R. Marder. Synthesis, Ionisation Potentials and Electron Affinities of Hexaazatrinaphthylene Derivatives. *Chemistry – A European Journal*. **2007**;13:3537-3547.

Table S2

Energy parameters predicted by theoretical DFT PBE /3 $\zeta$  calculations for characterization of thermodynamic stability and fragmentation of HMHATA molecule/anion and those obtained from RRKM model

| Energy parameter                                                 | DFT PBE /3 $\zeta$                                                                                                                                                                                       |                  | Best fit result from RRKM model, eV |
|------------------------------------------------------------------|----------------------------------------------------------------------------------------------------------------------------------------------------------------------------------------------------------|------------------|-------------------------------------|
|                                                                  | Description *                                                                                                                                                                                            | Value, eV        |                                     |
| <i>Molecule</i>                                                  |                                                                                                                                                                                                          |                  |                                     |
| Molecular adiabatic electron affinity                            | structure <b>A</b> (see Chart 1)<br>EA <sub>a</sub> ( <sup>2</sup> M <sup>-</sup> → <sup>1</sup> M+e)                                                                                                    | 1.748            | 1.875                               |
|                                                                  | structure <b>B</b>                                                                                                                                                                                       | 2.032            |                                     |
| <i>Dehydrogenation</i>                                           |                                                                                                                                                                                                          |                  |                                     |
| Adiabatic electron affinity of dehydrogenated molecule           | structure <b>A</b> , position 1(CH <sub>3</sub> )<br>EA <sub>a</sub> ( <sup>3</sup> [M-H] <sup>-</sup> → <sup>2</sup> [M-H] <sup>•</sup> + e)                                                            | 1.940            | –                                   |
|                                                                  | structure <b>A</b> , position 2<br>EA <sub>a</sub> ( <sup>3</sup> [M-H] <sup>-</sup> → <sup>2</sup> [M-H] <sup>•</sup> + e)                                                                              | 2.267            | –                                   |
| Bond dissociation energies for detachment of hydrogen atom       | from neutral molecule's position 1(CH <sub>3</sub> ),<br>BDE( <sup>1</sup> M → <sup>2</sup> [M-H] <sup>•</sup> + <sup>2</sup> H <sup>•</sup> )                                                           | 3.983            | –                                   |
|                                                                  | from molecular anion's position 1(CH <sub>3</sub> ),<br>BDE( <sup>2</sup> M <sup>-</sup> → <sup>3</sup> [M-H] <sup>-</sup> + <sup>2</sup> H <sup>•</sup> )                                               | 4.023            | –                                   |
| Threshold appearance energy                                      | AE( <sup>1</sup> M+e → <sup>3</sup> [M-H] <sup>-</sup> + <sup>2</sup> H <sup>•</sup> )                                                                                                                   | 2.066            | –                                   |
| <i>Demethylation</i>                                             |                                                                                                                                                                                                          |                  |                                     |
| Adiabatic electron affinity of demethylated molecule             | structure <b>A</b><br>EA <sub>a</sub> ( <sup>1</sup> [M-CH <sub>3</sub> ] <sup>-</sup> → <sup>2</sup> [M-CH <sub>3</sub> ] <sup>•</sup> + e)                                                             | 2.703            | –                                   |
| Bond dissociation energies for detachment of one methyl group    | from neutral molecule,<br>BDE( <sup>1</sup> M → <sup>2</sup> [M-CH <sub>3</sub> ] <sup>•</sup> + <sup>2</sup> CH <sub>3</sub> <sup>•</sup> )                                                             | 2.287            | –                                   |
|                                                                  | from molecular anion,<br>BDE( <sup>2</sup> M <sup>-</sup> → <sup>1</sup> [M-CH <sub>3</sub> ] <sup>-</sup> + <sup>2</sup> CH <sub>3</sub> <sup>•</sup> )                                                 | 1.509            | 1.709                               |
| Threshold appearance energy                                      | AE( <sup>1</sup> M+e → <sup>1</sup> [M-CH <sub>3</sub> ] <sup>-</sup> + <sup>2</sup> CH <sub>3</sub> <sup>•</sup> )                                                                                      | -0.448           | –                                   |
| <i>Second stage demethylation</i>                                |                                                                                                                                                                                                          |                  |                                     |
| Adiabatic electron affinity of doubly demethylated molecule      | Structure <b>A</b> , demethylated positions 1 and 4,<br>EA <sub>a</sub> ( <sup>2</sup> [M-2CH <sub>3</sub> ] <sup>-</sup> → <sup>1</sup> [M-2CH <sub>3</sub> ] <sup>•</sup> + e)                         | 2.494            | –                                   |
| Bond dissociation energies for detachment of second methyl group | from fragment anion's position 4,<br>BDE( <sup>1</sup> [M-CH <sub>3</sub> ] <sup>-</sup> → <sup>2</sup> [M-2CH <sub>3</sub> ] <sup>-</sup> + <sup>2</sup> CH <sub>3</sub> <sup>•</sup> )                 | 1.755            | 1.765                               |
|                                                                  | from fragment anion's positions 7, 10, 13, or 16,<br>BDE( <sup>1</sup> [M-CH <sub>3</sub> ] <sup>-</sup> → <sup>2</sup> [M-2CH <sub>3</sub> ] <sup>-</sup> + <sup>2</sup> CH <sub>3</sub> <sup>•</sup> ) | 2.158 –<br>2.235 | –                                   |
| Threshold appearance energy                                      | AE( <sup>1</sup> M+e → <sup>2</sup> [M-2CH <sub>3</sub> ] <sup>-</sup> + <sup>2</sup> CH <sub>3</sub> + <sup>2</sup> CH <sub>3</sub> <sup>•</sup> )                                                      | 1.307            | –                                   |

| <i>Demethoxylation</i>                                      |                                                                                          |       |   |
|-------------------------------------------------------------|------------------------------------------------------------------------------------------|-------|---|
| Adiabatic electron affinity of demethoxylated molecule      | structure <b>A</b><br>$EA_a(^3[M-OCH_3]^- \rightarrow ^2[M-OCH_3]^{\cdot} + e)$          | 2.090 | – |
| Bond dissociation energies for detachment of methoxyl group | from neutral molecule,<br>$BDE(^1M \rightarrow ^2[M-OCH_3]^{\cdot} + ^2OCH_3^{\cdot})$   | 4.093 | – |
|                                                             | from molecular anion,<br>$BDE(^2M^{\cdot-} \rightarrow ^3[M-OCH_3]^- + ^2OCH_3^{\cdot})$ | 3.987 | – |
| Threshold appearance energy                                 | $AE(^1M + e \rightarrow ^3[M-OCH_3]^- + ^2OCH_3^{\cdot})$                                | 2.030 | – |

\* See Chart 1 for the structures **A** and **B**. Left superscript denotes a spin multiplicity of corresponding lowest-energy species.
